# Supplementary material for: Landslide Hazard Microzonation Using a Hybrid Integrated Approach to Reduce Disaster Risk: A Case Study of Jecheon, South Korea
Source: Copernicus journal article supplement (doi:10.5194/egusphere-2025-1169), 2025-06-13
Supplement: Supplementary file [file egusphere-2025-1169-AC1-supplement.pdf]

My co-authors and I would like to express our gratitude to the reviewers for their constructive feedback and suggestions for strengthening our research. The changes we have made to the attached file in response to such feedback and suggestions have been highlighted in blue to facilitate their identification. I would also like to offer my apologies for the length of time it took us to prepare this response.

### Response to Reviewer #1

**Overall Observations:** This study utilizes 112 landslide inventory points in Jecheon, South Korea, to generate landslide susceptibility maps using four commonly applied models: Frequency Ratio (FR), Certainty Factor (CF), Logistic Regression (LR), and Information Value (IV). The spatial consistency of the predicted Landslide Susceptibility Index (LSI) with observed landslide profiles was assessed using high-resolution aerial and drone imagery. To address observed spatial inconsistencies, a hybrid integrated model was proposed, resulting in a microzonation hazard map that reportedly shows improved predictive performance, with high precision metrics such as an AUC of 0.906. However, the manuscript has several critical flaws.

Thank you for your insightful review. We are very grateful for your constructive suggestions, which have greatly helped improve the preprint.

**Comment 1:** First, the landslide distribution map is of low quality and the number of samples is insufficient to represent the actual pattern of landslide development in the region, especially in the context of rainfall-induced clustered events. The limited sample size also raises concerns about severe overfitting, which can lead to high accuracy on training data but poor generalization in real-world applications.

**Response:** Thank you for your insightful observation. In the present study, the inventory database was created using high-resolution aerial imagery (obtained from <http://map.ngii.go.kr/ms/map/>), historical Google Earth imagery, field investigation and compilation of available inventory data from the Korea Forest Service (KFS). As suggested, we further rigorously used historical Google Earth imagery and aerial photographs to update the landslide inventory data. Subsequently, we prepared an updated landslide inventory ( $n=160$ ) map of the Jecheon-si region, as shown in Fig. 5. Additional, in the revised manuscript, to better understand the spatial distribution of landslide events in this region, we analyzed the long-term (2000-2019) maximum daily rainfall intensities using TRMM (Tropical Rainfall

Measuring Mission, <https://gpm.nasa.gov/missions/trmm>) datasets processed in Google Earth Engine. Results revealed that maximum rainfall intensity ranged from 43.74 to 56.7 mm/day across the region, with the central and northern parts exhibiting significantly higher values (Fig. 5). This pattern aligns with the concentration of landslide events in the northern and central parts of the study region, indicating higher rainfall intensity is a critical factor controlling the spatial distribution of landslides. Subsequently, long-term rainfall intensity was utilized as a triggering factor for the landslide hazard microzonation analysis.

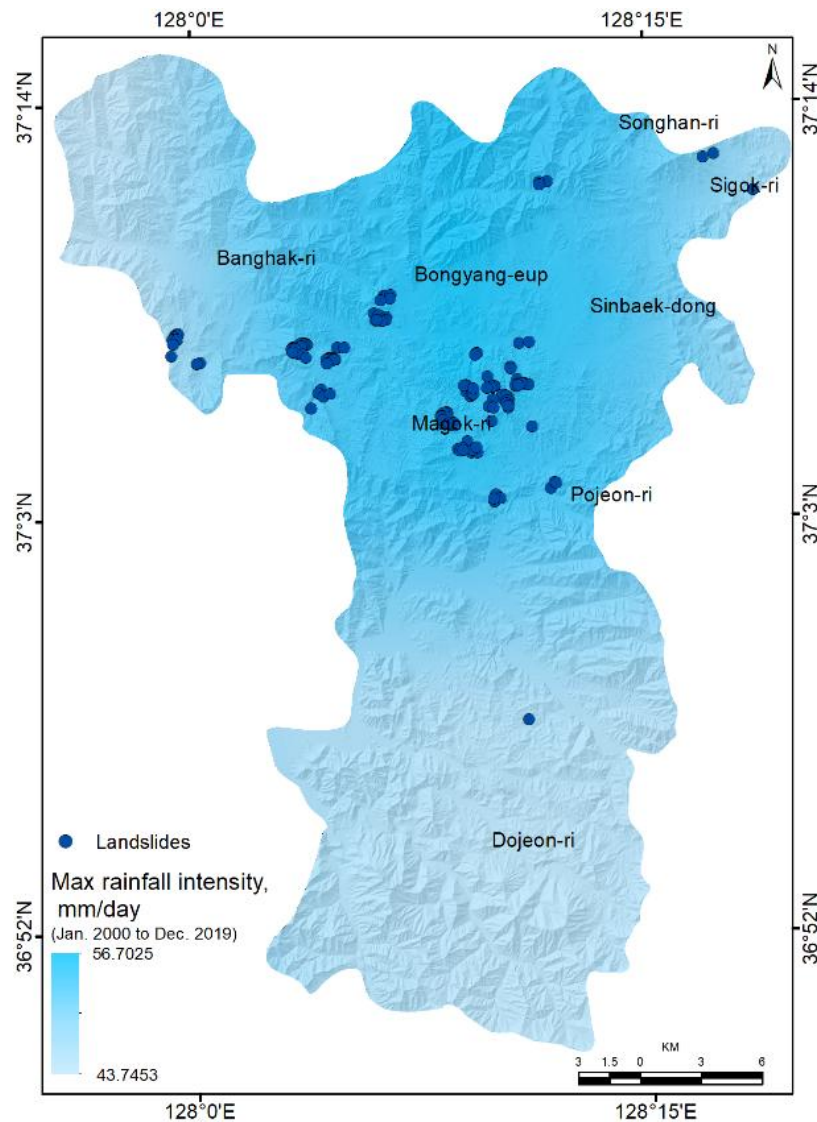

Figure 5. Maximum rainfall intensity (mm/day) distribution of the region for the period of 2000 to 2019, and spatial distribution of landslide inventory.

Regarding potential overfitting, the spatial clustering and limited inventory size indeed limit the suitability of data-intensive ML models. For this reason, we adopted widely used

interpretable statistical approaches, FR, IV, CF, and LR, which are robust under data-scarce conditions (Ding et al., 2025; Xie et al., 2017). To train and validate the LSI models, we randomly split the landslide inventory dataset into training and testing, i.e., 70% and 30%, respectively (Nguyen et al., 2021; Zhou et al., 2021b; Aditian et al., 2018). Model performance was evaluated using AUC, MAE, MSE, and RMSE (Table 4). It was observed that all models achieved  $AUC > 0.85$  for both training and testing, indicating high discriminative ability. The LR model yielded the highest AUC (0.901 training, 0.930 testing), while FR, IV, and CF achieved slightly lower but comparable results (0.858-0.910). Although LR displayed slightly higher MAE, MSE, and RMSE values, all models demonstrated robust predictive accuracy without clear signs of overfitting.

Table 4. Validation of models by AUC, RMSE, MSE, and MAE.

| Models | Traing |       |       |       | Validation |       |       |       |
|--------|--------|-------|-------|-------|------------|-------|-------|-------|
|        | AUC    | MAE   | MSE   | RMSE  | AUC        | MAE   | MSE   | RMSE  |
| FR     | 0.879  | 0.291 | 0.092 | 0.303 | 0.905      | 0.267 | 0.078 | 0.279 |
| IV     | 0.858  | 0.248 | 0.068 | 0.261 | 0.910      | 0.220 | 0.053 | 0.230 |
| CF     | 0.861  | 0.236 | 0.063 | 0.252 | 0.917      | 0.204 | 0.046 | 0.215 |
| LR     | 0.901  | 0.306 | 0.174 | 0.417 | 0.930      | 0.238 | 0.125 | 0.354 |

Additionally, to explicitly assess model generalization in real-world scenarios, we tested spatial characteristics of the model outputs against recent landslide sites not included in the inventory by utilizing high-resolution LiDAR DEM, aerial photographs (NGII, 2020-2021), and drone surveys (August 2020). It was observed that even though the statistical model evaluation revealed high AUC values and acceptable statistical metrics, spatial analysis revealed inconsistencies of LSI distribution in landslide source and deposition zones (Figs. 14 and S1). For instance, FR, IV, and CF models predicted high LSI values in both the crown ( $\sim 0.75$ ) and deposit ( $\sim 0.69$ ) zones, whereas LR predicted moderate susceptibility in the crown ( $\sim 0.62$ ) but very low in the deposit ( $\sim 0.05$ ). To overcome this issue, we put forth a hybrid integrated strategy to verify whether the LSI derived from the integrated approach aligns with topography, geomorphic features, and landslide characteristics. It was observed that the LSI predicted through the integrated approach resolves spatial inconsistencies by combining the strengths of multiple models, which was not in the earlier case. For example, a high LSI value was observed in the landslide source area (i.e., 0.75 to 0.9), while a comparatively lower LSI value was observed in the landslide deposit zone (i.e., 0.35-0.55). This cross-temporal

validation confirms that the proposed models are not overfit to historical events and can reliably predict landslide-prone zones under varying topographic and geomorphic settings. Moreover, the hybrid integrated strategy leverages the complementary strengths of the individual models, yielding improved spatial coherence and practical applicability for real-world landslide hazard management and proactive mitigation planning.

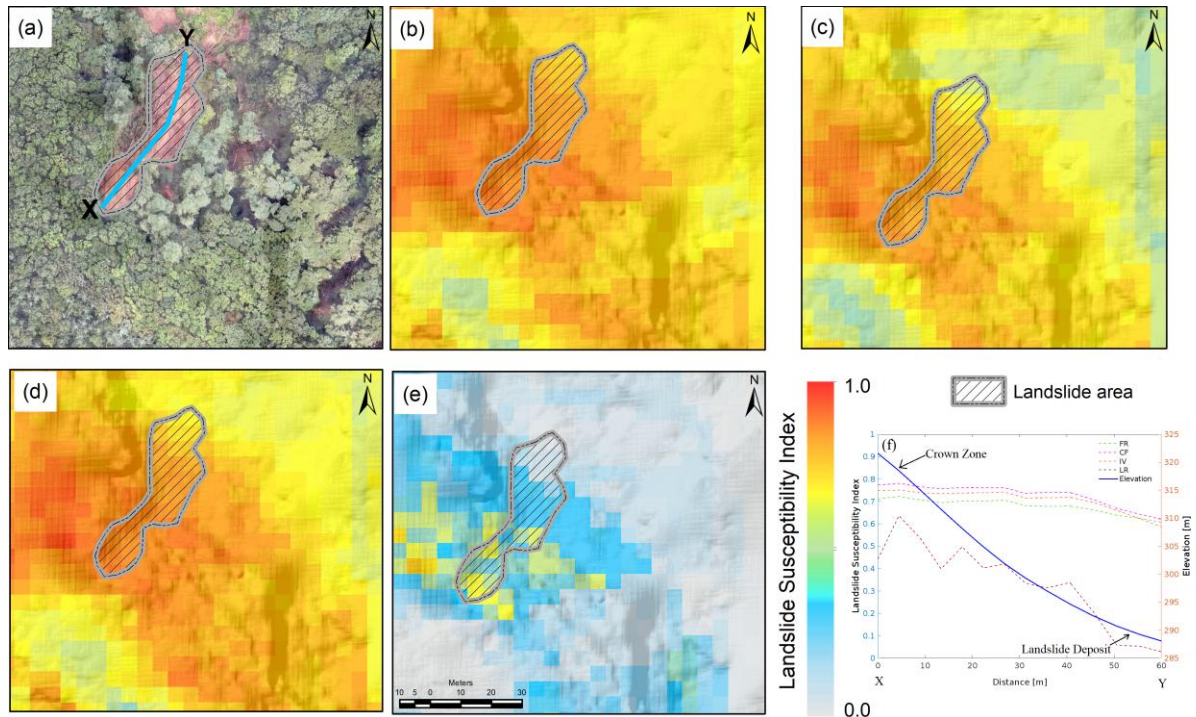

Figure 14. Spatial characteristics of predicted LSIs: (a) Drone image captured in August 2020, (b) LSI based on the FR model, (c) LSI based on the IV model, (d) LSI based on the CF model, (e) LSI based on the LR model and (f) elevation profile and LSI distribution from the landslide source area to landslide deposit zone (additional experimental site is illustrated in Figure S1 (electronic supplementary data)).



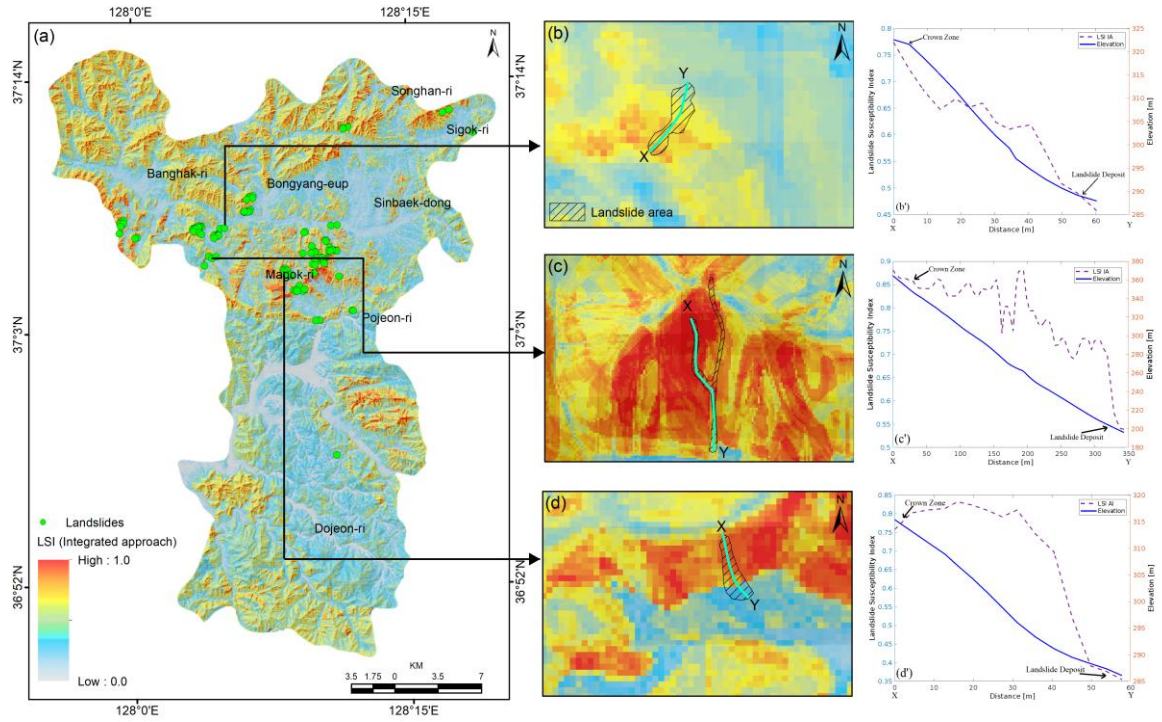

Figure S1. LSI based on the hybrid integrated approach: (a) spatial distribution of LSI in the Jecheon-si region, (b-d) the details of LSI distribution of three recent past landslide events, and (b'-d') elevation profile and LSI distribution from the landslide source area to the deposition zone at different landslide sites.

In the revision, we incorporated the above discussion to address concerns about sample size, minimize the risk of overfitting, and enhance the generalization capability of the proposed hybrid integrated LSI model.

**Comment 2:** Additionally, the manuscript lacks meaningful and insightful scientific discussion. The spatial inconsistency between predicted susceptibility and actual landslide characteristics is acknowledged but not adequately analyzed or explained.

**Response:** Thank you for your comment and for acknowledging the discussion regarding the spatial inconsistency between predicted susceptibility and actual landslide characteristics. In the revision, we incorporated additional analyses and explanations to interpret these discrepancies better, as highlighted below,

Figure 13 illustrates the ROC-AUC values of the FR, IV, CF and LR models, which reveal that all four models demonstrate strong discriminatory power, with AUC values consistently exceeding 0.85, indicating high model reliability. It was observed that the LR model achieved the highest AUC values for both training (0.901) and testing (0.930) datasets,

signifying its superior generalization capability and robustness in capturing the non-linear relationships between landslide occurrence and contributing factors. The FR model yielded AUCs of 0.879 (training) and 0.905 (testing), followed closely by IV (0.858 and 0.910) and CF (0.861 and 0.917), reflecting their competency in bivariate and heuristic-based spatial correlation assessments. Nevertheless, all models yielded acceptable and comparable prediction accuracies in both the training and testing datasets, indicating their robustness for landslide susceptibility mapping. Therefore, selecting an appropriate model for landslide susceptibility mapping is difficult, even though the performances and prediction accuracy of all the discussed models were acceptable.

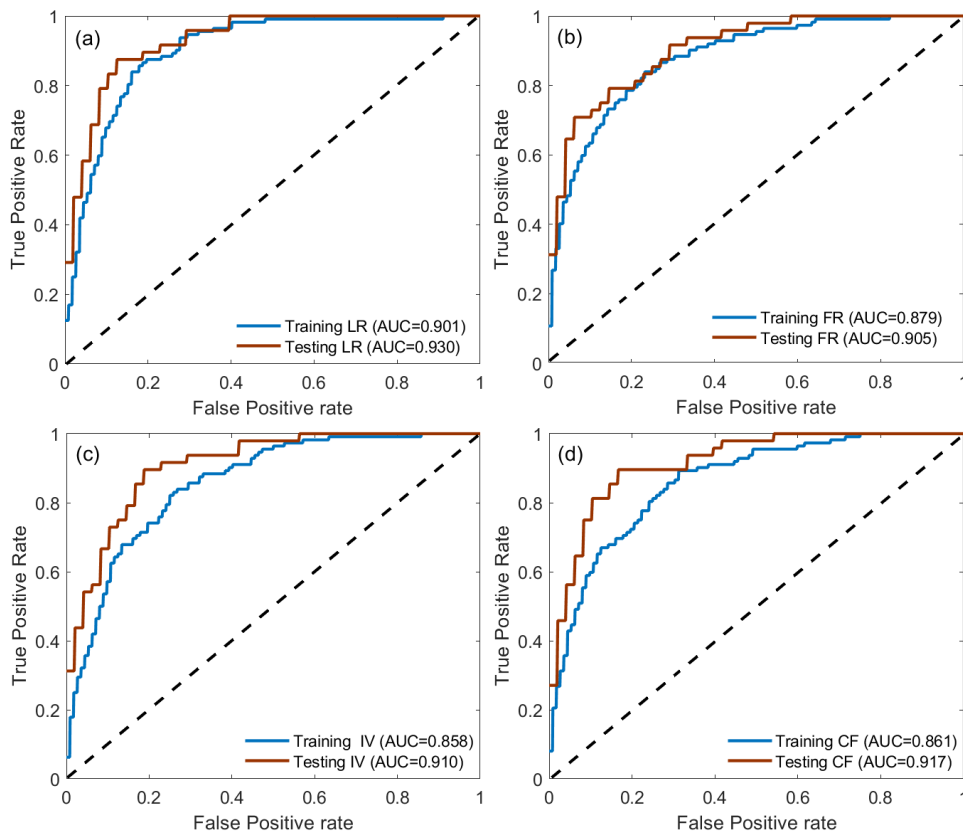

Figure 13. ROC curves and corresponding AUC values for four LSI models: (a) LR, (b) FR, (c) IV and (d) CF models [Note: Blue and red curves denote training and testing datasets, respectively, used for model evaluation. The block dotted line represents the random guess].

In this study, we used an alternative approach to evaluate the LSI results and explicitly assess model generalization in real-world scenarios. The approach integrates a high-resolution DEM (5×5m), aerial photos, and drone images of recent past landslide events (not included in the inventory datasets) to verify whether the unmapped landslide sites fall within the predicted

very high susceptibility zones (He et al., 2021). We also used the 1D elevation profile to check whether the predicted LSI distribution is consistent with the topographic, geomorphic, and landslide characteristics. Consequently, we selected recent event sites that have not previously experienced landslides to better demonstrate the experimental analysis and evaluate the model accuracy. For these purposes, we acquired aerial photos from the NGII web portal (<https://map.ngii.go.kr/>) for 2020 to 2021, and the drone survey was conducted in August 2020. Figure 14 depicts the predicted LSI distributions and the landslide area marked on a dronograph and elevation profile from the landslide source area to the landslide deposition zone. The landslide-affected regions are clearly visible in the drone imagery (Figs. 14a). The predicted LSI value based on the FR, IV, and CF models was found to be very high in both the crown (i.e.,  $\sim 0.75$ ) and the landslide deposit zone (i.e.,  $\sim 0.69$ ) (Fig. 14f). In contrast, the LSI predicted by the LR model was low in the landslide deposit zone (i.e.,  $\sim 0.05$ ) and moderate in the crown zone (i.e.,  $\sim 0.62$ ) (Fig. 14f). A similar experimental results was also found at different landslide event as depicted in Fig. S1 (supplementary data). It was observed that all models could identify the landslide source area precisely; however, differences in susceptibility distribution highlight that spatial consistency with topography varies by model.

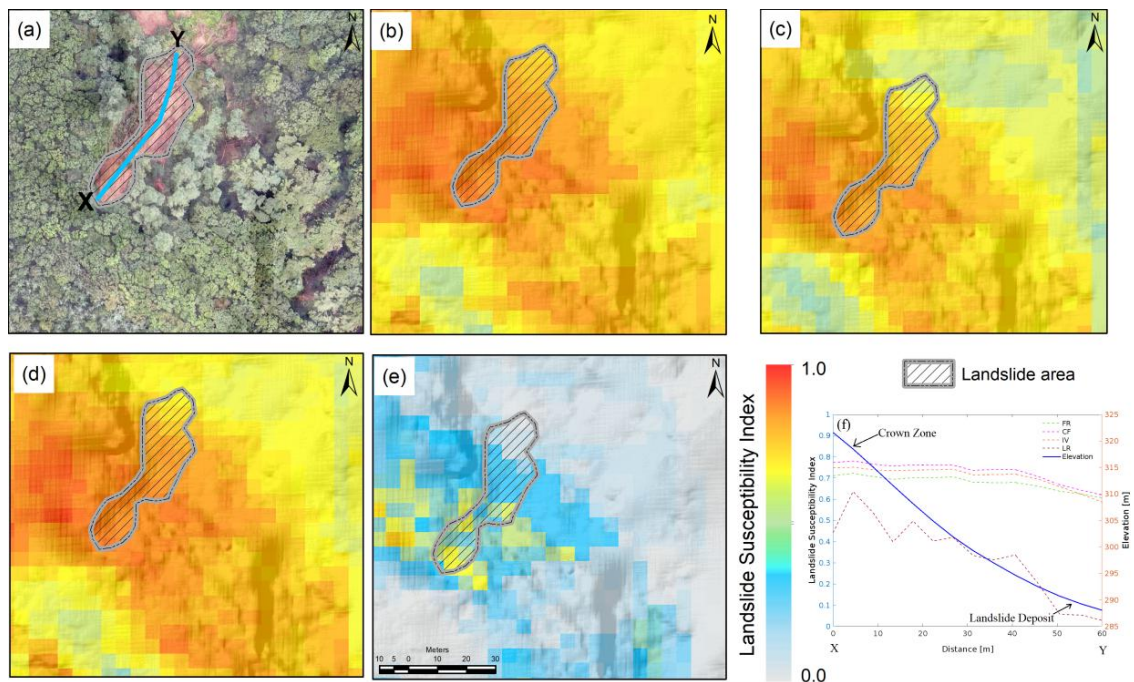

Figure 14. Spatial characteristics of predicted LSIs: (a) Drone image captured in August 2020, (b) LSI based on the FR model, (c) LSI based on the IV model, (d) LSI based on the CF model, (e) LSI based on the LR model and (f) elevation profile and LSI distribution from the landslide source area to landslide deposit zone.

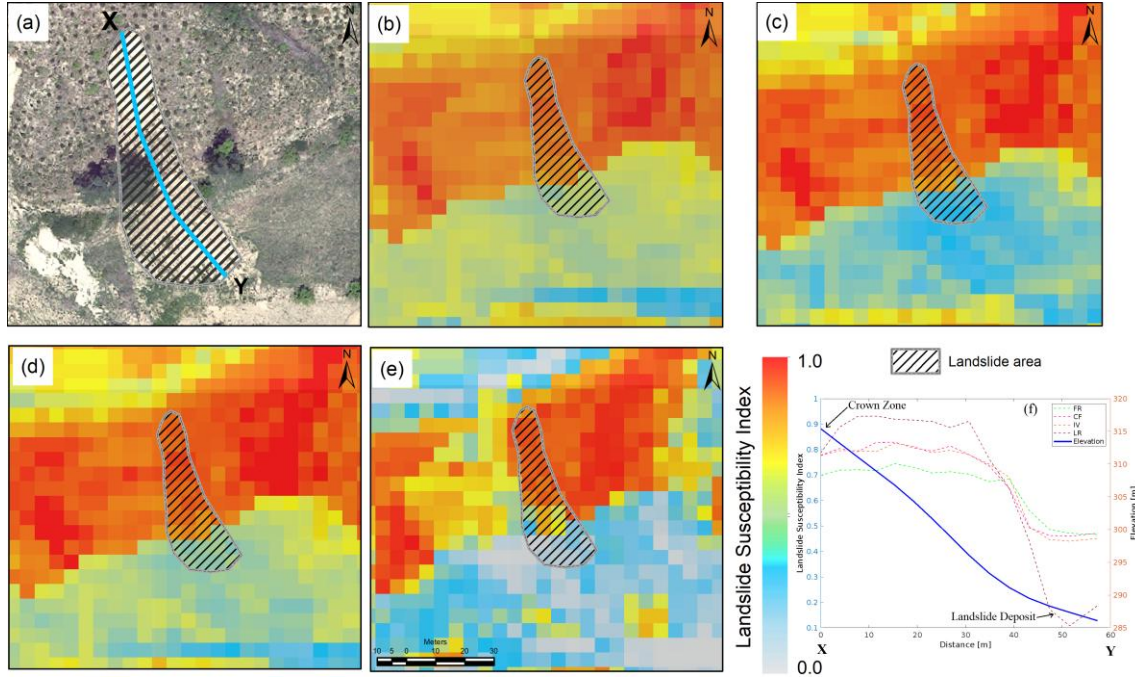

Figure S1: Spatial characteristics of predicted LSIs: (a) Aerial image acquired in October 2021, (b) LSI based on the FR model, (c) LSI based on the IV model, (d) LSI based on the CF model, (e) LSI based on the LR model and (f) elevation profile and LSI distribution from crown zone to landslide deposit zone.

The varying sensitivity of the FR, IV, CF, and LR models to depositional and source-zone features primarily arises from the inherent differences in their methodological frameworks and ability to capture complex spatial relationships between landslide occurrence and conditioning factors. The LR model, as a multivariate parametric approach, explicitly quantifies the combined and potentially non-linear effects of multiple geomorphological, geological, topographical, hydrological and forest factors, allowing it to capture subtle spatial heterogeneities and interactions that characterize the transition from landslide source zones, marked by steep slopes, high shear stress, and mechanical instability, to depositional zones where slope gradients decrease and sediment accumulates, reducing failure susceptibility. Therefore, LR results in higher predicted susceptibility values in source areas and lower values in depositional zones, reflecting the physical processes of landslide initiation and deposition. In contrast, bivariate heuristic models such as FR, IV, and CF operate on simplified assumptions of factor independence and spatial correlation, evaluating susceptibility based primarily on relative frequency or certainty values within discrete factor classes, which can lead to similar susceptibility assignments across both source and depositional zones if they share common terrain attributes, thereby limiting their spatial discriminatory power.



Consequently, to overcome this issue, we put forth a hybrid integrated strategy to verify whether the LSI derived from the integrated approach aligns with topography, geomorphic features, and landslide characteristics.

The hybrid integrated approach synergistically combines the parametric rigor of LR with the heuristic spatial correlation strengths of FR, IV, and CF models, producing a landslide susceptibility index that aligns closely with the topographic and geomorphic evidence by accurately distinguishing initiation zones of high instability from depositional zones of relative stability. It was observed that the hybrid approach resolves spatial inconsistencies by combining the strengths of multiple models (Fig. 15). For example, a high LSI value was observed in the landslide source area (i.e., 0.75 to 0.9), while a comparatively lower LSI value was observed in the landslide deposit zone (i.e., 0.35-0.55). Each model captures distinct aspects of terrain and susceptibility patterns, and their integration reduces localized prediction errors. Weighted averaging further ensures that models with stronger predictive abilities influence the final susceptibility map more, leading to higher spatial alignment with observed landslide patterns. This cross-temporal validation confirms that the proposed models are not overfit to historical events and can reliably predict landslide-prone zones under varying topographic and geomorphic settings. The hybrid integrated LSI model was further examined using AUC, MSE, MAE, and RMSE with the landslide inventory data exhibiting good consistency with the in-situ observations (AUC=0.908, MSE=0.082, MAE=0.259, and RMSE=0.286). On the other hand, correct classification percentages (for a 0.5 cut-off value) are also calculated to assess the LSI's sensitivity (Gorum et al., 2008). It was exhibited that the integrated models have a prediction capacity of 94.6% (Fig. 17a). The AUC value obtained from the integrated model is 0.909, which also suggests a high landslide prediction rate (Fig. 17b). It is noted that although the anticipated landslide susceptibility index from all the models indicates the degree of field instability, there are variations in their predictive consistency. The LSI predicted based on the hybrid integrated method was consistent with the topographic and landslide characteristics (Bhuyan et al., 2025), suggesting more reliable and appropriate outcomes than other models. This improved spatial consistency is crucial for accurate landslide risk assessment and mitigation. Moreover, the hybrid integrated strategy leverages the complementary strengths of the individual models, yielding improved spatial coherence and practical applicability for real-world landslide hazard management and proactive mitigation planning. Subsequently, the LSI calculated through the hybrid integrated approach was used

for further analysis.

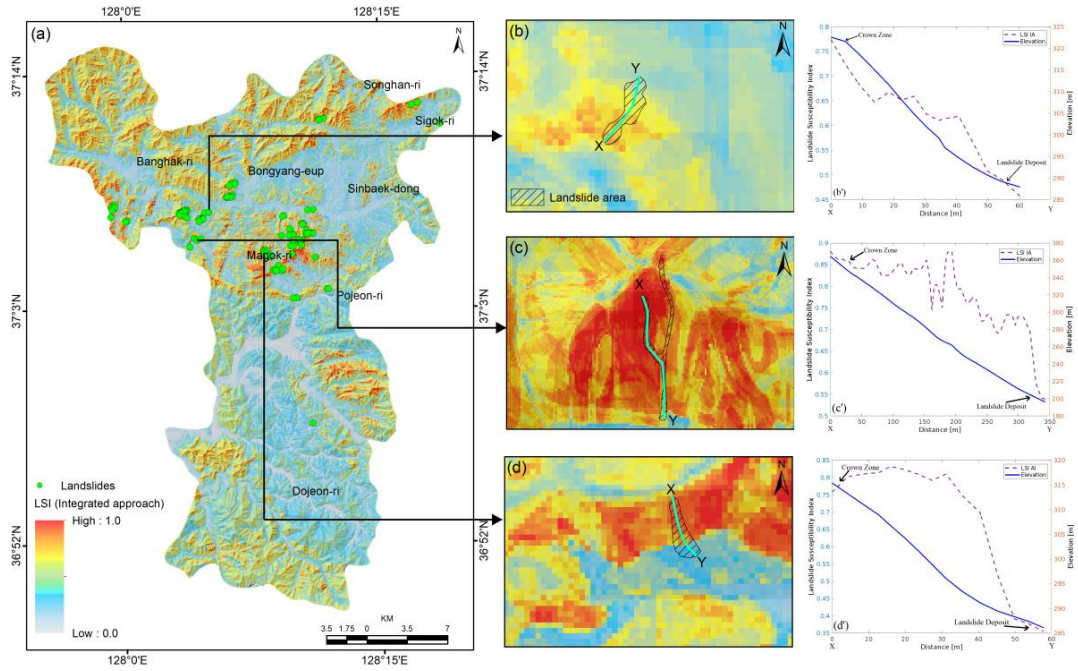

Figure 15. LSI based on the hybrid integrated approach: (a) spatial distribution of LSI in the Jecheon-si region, (b-d) the details of LSI distribution of three recent past landslide events, and (b'-d') elevation profile and LSI distribution from the landslide source area to the deposit zone at different landslide sites.

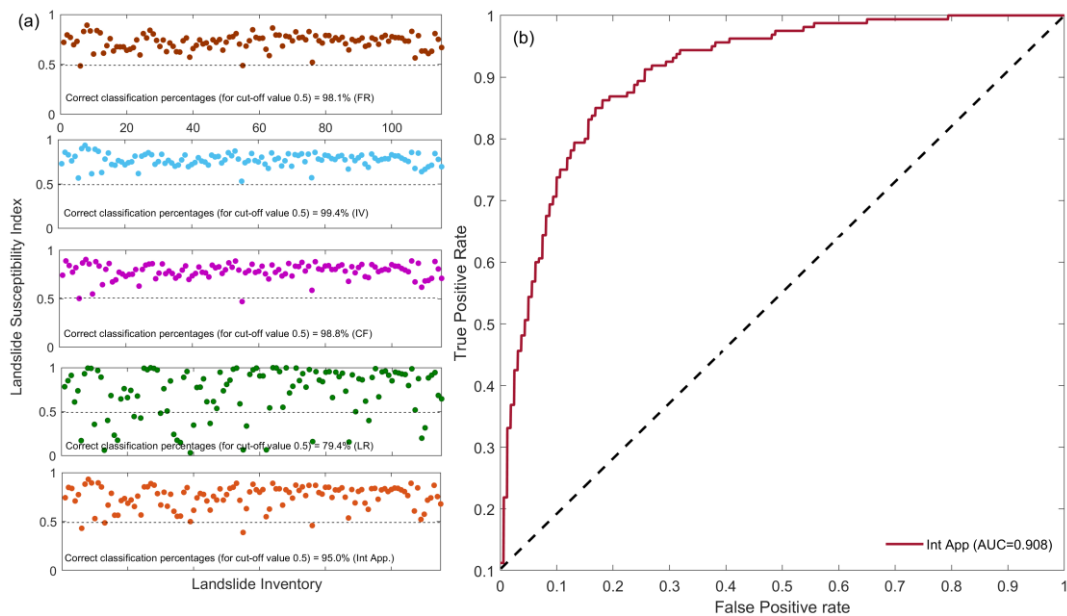

Figure 17. (a) the estimated LSI corresponding to the landslide inventory datasets with correct classification percentages, and (b) model performance of the proposed integrated approach based on the AUC.

**Comment 3:** There is also a lack of in-depth analysis of model limitations, data uncertainties, and regional applicability, which significantly weakens the scientific value of the work. Based on these issues, I recommend rejection.

**Response:** We appreciate the reviewer's concern regarding the limitations of the applied FR, IV, CF, and LR models, as well as data uncertainties, and the regional applicability of the proposed hybrid integrated approach. In the revision, we have expanded the discussion on the sensitivity of the LSI models and examined how these widely used approaches may influence susceptibility mapping results. We have also explicitly addressed data-related uncertainties, including inventory completeness and potential biases in landslide sampling. Furthermore, we evaluated the regional applicability of the proposed approach by discussing its transferability to other regions with similar geomorphological and climatic settings, along with the associated constraints. These additions aim to enhance the scientific value of the present work by providing a transparent and critical assessment of methodological and contextual limitations. Accordingly, we updated several sections by incorporating existing model limitations, data uncertainties, limitations of the present study, and regional applicability of the proposed model, as highlighted below.

Landslide susceptibility models, whether statistical, probabilistic, or machine-learning based, inevitably face limitations due to the complex, non-linear, and site-specific nature of landslide processes, the heterogeneity of conditioning factors, and the variability of triggering mechanisms across temporal and spatial scales. While numerous statistical approaches such as FR, IV, CF, and LR have been successfully applied on various geographic regions (Merghadi et al., 2020; Shano et al., 2020; Park et al., 2013), none are universally optimal, and their predictive capacity depends heavily on inventory quality, factor relevance, and geomorphological context (Aditian et al., 2018; Tang et al., 2020). Furthermore, a landslide susceptibility index typically indicates areas that are more prone to landslides based on various factors and parameters. Thus, previous studies have primarily focused on assessing the overall performance of predicted susceptibility rather than examining the spatial characteristics of the predicted LSI. The overall accuracy of widely accepted models may produce acceptable LSIs in terms of AUC, MAE and RMSE, but it may not always be comparable with the topographic, geomorphic and landslide characteristics. Therefore, the main novelties of the present investigation include the development of LSI models using different widely adopted statistical models and uncertainty evaluation based on the spatial characteristics of the predicted landslide

susceptibility index to study previously overlooked accuracy criteria and propose a hybrid integrated approach to achieve higher accuracy than the individual LSI models. We also used both AUC-based performance metrics and error-based measures (MAE, MSE, RMSE) for each LSI model, comparing training and testing datasets. This dual evaluation mitigates the over-reliance on AUC alone and provides a more robust understanding of prediction quality. We also performed multicollinearity diagnostics to ensure that selected variables met VIF and tolerance thresholds, reducing redundancy-induced uncertainty. Subsequently, we have highlighted spatial consistency analysis of the predicted LSIs as an innovative aspect of this study. By examining the susceptibility patterns in both source zones and deposit zones, we identified discrepancies where high AUC scores did not necessarily align with known landslide initiation areas. This analysis provides additional diagnostic insight into model robustness, beyond conventional accuracy statistics. To overcome this issue, we put forth a hybrid integrated strategy to verify whether the LSI derived from the integrated approach aligns with topography, geomorphic features, and landslide characteristics. It was observed that the LSI predicted through the integrated approach resolves spatial inconsistencies by combining the strengths of multiple models, which was not in the earlier case. For example, a high LSI value was observed in the landslide source area (i.e., 0.75 to 0.9), while a comparatively lower LSI value was observed in the landslide deposit zone (i.e., 0.35-0.55). This cross-temporal validation confirms that the proposed models are not overfit to historical events and can reliably predict landslide-prone zones under varying topographic and geomorphic settings. Moreover, the hybrid integrated strategy leverages the complementary strengths of the individual models, yielding improved spatial coherence and practical applicability for real-world landslide hazard management and proactive mitigation planning.

Although the developed hybrid integrated LSI model and LHM map revealed acceptable prediction accuracy with spatial consistency, this approach has several inherent limitations due to the complex, non-linear nature of landslide processes, the heterogeneity of conditioning factors, and the spatio-temporal variability of triggering mechanisms. In the present study, the landslide inventory (n=160) was compiled from multi-sourced data, including aerial photographs, historical Google Earth imagery, field investigations, and recorded data from the Korea Forest Service (KFS). Although diverse in origin, this inventory is spatially clustered in the central to northern part of the study region, reflecting spatial rainfall patterns controls. The moderate inventory size and spatial clustering limit the events-per-



variable ratio in LSI models and risk of pseudo-replication, increasing parameter uncertainty and reducing generalization capability. Moreover, the class imbalance may bias model calibration toward the dominant class. Further, for LSI model development, we considered 18 influencing factors, viz., topographic slope, aspect, landforms class, average shear-wave velocity, TPI, CI, TWI, TRI, plan curvature, profile curvature, SPI, SL, surface lithology, soil thickness, timber density, timber age, soil type, and timber diameter. These factors are widely used for the LSI models in South Korea; however, the inclusion of dynamic influencing factors such as high-resolution NDVI and LULC in future studies may increase spatial consistency by incorporating characteristics of landslide dynamics in the mountainous region, as frequent forest fires impact the South Korean mountainous region. Further, we conducted multicollinearity diagnostics (Table 2) to ensure statistical robustness of the selected influencing factors. However, additional collinearity and feature-importance tests, such as the Pearson correlation coefficient (PCC) and information gain ratio, could be applied to refine the selection of influencing factors. Moreover, a machine learning-based feature selection approach may be adopted in future studies to optimize model performance further.

In addition, the applied FR, IV, CF, LR, and integrated hybrid models rely on the premise that future landslides occur under conditions similar to past events; however, this assumption may lead to model overfitting, limited generalization, or bias if the historical inventory is incomplete or unrepresentative. It is also acknowledged that even though FR, IV, and CF models differ in their computation and interpretation of spatial relationships between landslide events and conditioning factors, they share similar probabilistic foundations. Therefore, incorporating advanced ML and ensemble algorithms in future modeling could further enhance the accuracy and predictive power of LSIs. Further, the inclusion of maximum daily rainfall intensity (2000-2019) as a triggering factor to determine LHM of the region enhances the model's temporal relevance, yet regional rainfall thresholds vary and require site-specific adjustment. Therefore, in future studies, we intend to use site-specific long-term rainfall intensity data from AWSs to better account for local variations in triggering factors, which could improve the landslide hazard microzonation zones. Further, the LSI models utilized in the present study were calibrated for the humid monsoon climate, steep terrain, and lithological complexity of Jecheon-si region, South Korea. While the methodological framework is transferable to other regions, the factor weights and model coefficients should be recalibrated based on the local inventories and environmental conditions.

## References

- Adition, A., Kubota, T., and Shinohara, Y.: Comparison of GIS-based landslide susceptibility models using frequency ratio, logistic regression, and artificial neural network in a tertiary region of Ambon, Indonesia, *Geomorphology*, 318, 101-111, <https://doi.org/10.1016/j.geomorph.2018.06.006>, 2018.
- Bhuyan, K., Rana, K., Ozturk, U., Nava, L., Rosi, A., Meena, S.R., Fan, X., Floris, M., van Westen, C. and Catani, F.: Towards automatic delineation of landslide source and runout, *Eng. Geol.*, 345, 107866, <https://doi.org/10.1016/j.enggeo.2024.107866>, 2025.
- Ding, D., Wu, Y., Wu, T., and Gong, C.: Landslide susceptibility assessment in Tongguan District Anhui China using information value and certainty factor models, *Sci. Rep.*, 15(1), 12275, <https://doi.org/10.1038/s41598-025-93704-z>, 2025.
- Gorum, T., Gonencgil, B., Gokceoglu, C., and Nefeslioglu, H. A.: Implementation of reconstructed geomorphologic units in landslide susceptibility mapping: the Melen Gorge (NW Turkey), *Nat. Hazards*, 46(3), 323-351, <https://doi.org/10.1007/s11069-007-9190-6>, 2008.
- He, Y., Zhao, Z. A., Yang, W., Yan, H., Wang, W., Yao, S., Zhang, L., and Liu, T.: A unified network of information considering superimposed landslide factors sequence and pixel spatial neighbourhood for landslide susceptibility mapping, *Int. J. Appl. Earth Obs. Geoinf.*, 104, 102508, <https://doi.org/10.1016/j.jag.2021.102508>, 2021.
- Merghadi, A., Yunus, A. P., Dou, J., Whiteley, J., ThaiPham, B., Bui, D. T., Avtar, R., and Abderrahmane, B.: Machine learning methods for landslide susceptibility studies: A comparative overview of algorithm performance, *Earth Sci. Rev.*, 207, 103225, <https://doi.org/10.1016/j.earscirev.2020.103225>, 2020.
- Nguyen, Q.H., Ly, H.B., Ho, L.S., Al-Ansari, N., Le, H.V., Tran, V.Q., Prakash, I. and Pham, B.T.: Influence of data splitting on performance of machine learning models in prediction of shear strength of soil, *Math. Prob. Eng.*, 2021(1), 4832864, <https://doi.org/10.1155/2021/4832864>, 2021.
- Park, S., Choi, C., Kim, B., and Kim, J.: Landslide susceptibility mapping using frequency ratio, analytic hierarchy process, logistic regression, and artificial neural network methods at the Inje area, Korea. *Environ. Earth Sci.* 68(5), 1443-1464, <https://doi.org/10.1007/s12665-012-1842-5>, 2013.
- Shano, L., Raghuvanshi, T. K., and Meten, M.: Landslide susceptibility evaluation and hazard zonation techniques—a review, *Geoenviron. Disasters*, 7(1), 1-19, <https://doi.org/10.1186/s40677-020-00152-0>, 2020.
- Tang, Y., Feng, F., Guo, Z., Feng, W., Li, Z., Wang, J., Sun, Q., Ma, H. and Li, Y.: Integrating principal component analysis with statistically-based models for analysis of causal factors and landslide susceptibility mapping: A comparative study from the loess plateau area in Shanxi (China), *J. Clean. Prod.*, 277, 124159, <https://doi.org/10.1016/j.jclepro.2020.124159>, 2020.
- Xie, Z., Chen, G., Meng, X., Zhang, Y., Qiao, L., and Tan, L.: A comparative study of landslide

susceptibility mapping using weight of evidence, logistic regression and support vector machine and evaluated by SBAS-InSAR monitoring: Zhouqu to Wudu segment in Bailong River Basin, China. *Environ. Earth Sci.*, 76(8), 313, <https://doi.org/10.1007/s12665-017-6640-7>, 2017.

Zhou, X., Wu, W., Qin, Y., and Fu, X.: Geoinformation-based landslide susceptibility mapping in subtropical area, *Sci. Rep.*, 11(1), 1-16, <https://doi.org/10.1038/s41598-021-03743-5>, 2021b.
